# Supplementary material
Source: PubMed Central journal article supplement (PMC7566810)
Supplement: NIHMS1530235-supplement-Supplement.pdf [file NIHMS1530235-supplement-Supplement.pdf]

**Supplementary Information for ‘Sequence-Dependent Interfacial Adsorption and Permeation of Dipeptides across Phospholipid Membranes’**

*Chenyu Wei<sup>1,2\*</sup> and Andrew Pohorille<sup>1,2\*</sup>*

<sup>1</sup> NASA Ames Research Center, Mail Stop 239-4, Moffett Field, CA 94035, USA

<sup>2</sup> Department of Pharmaceutical Chemistry, University of California San Francisco

\* Corresponding authors:

chenyu.wei@nasa.gov; andrew.pohorille@nasa.gov

Table S1. The coordination number  $\langle \text{CN} \rangle$  from the nearest neighboring water and the oxygen atoms on lipid headgroup around a selected atom on dipeptide at the POPC membrane interface.

| $\langle \text{CN} \rangle$ ( from water) | Ace-Ser-Leu-NMe | Ace-Phe-Leu-NMe |
|-------------------------------------------|-----------------|-----------------|
| O (Ser or Phe backbone)                   | 1.0             | 1.4             |
| O (Leu backbone)                          | 1.1             | 1.0             |
| N (Ser or Phe backbone)                   | 0.6             | 0.7             |
| N (Leu backbone)                          | 0.6             | 0.3             |
| OG (Ser side chain)                       | 1.8             | /               |

| $\langle \text{CN} \rangle$ (from lipid headgroup) | Ace-Ser-Leu-NMe | Ace-Phe-Leu-NMe |
|----------------------------------------------------|-----------------|-----------------|
| N (Ser or Phe backbone)                            | 0.6             | 0.3             |
| N ( Leu backbone)                                  | 0.4             | 0.1             |
| OG (on Ser side chain)                             | 0.5             | /               |

Table S2. Position dependent diffusion coefficient for the three dipetides inside POPC membrane at various  $z$  position, which is calculated from autocorrelation function of random forces.<sup>1</sup>

| $D( \times 10^{-6} \text{ cm}^2/\text{s})$ | 0 Å  | -6 Å | -12 Å |
|--------------------------------------------|------|------|-------|
| Ace-Ser-Ser-NMe                            | 0.45 | 0.47 | 0.36  |
| Ace-Ser-Leu-NMe                            | 0.41 | 0.42 | 0.22  |
| Ace-Phe-Leu-NMe                            | 0.40 | 0.60 | 0.14  |

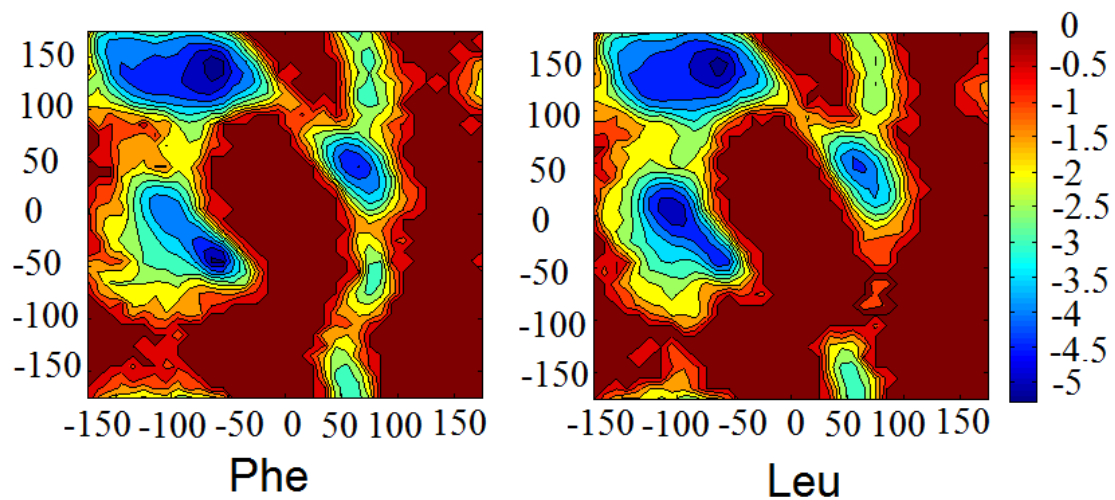

Figure S1. Ramachandran map for the backbone conformation of Ace-Phe-Leu-NMe in aqueous solution.

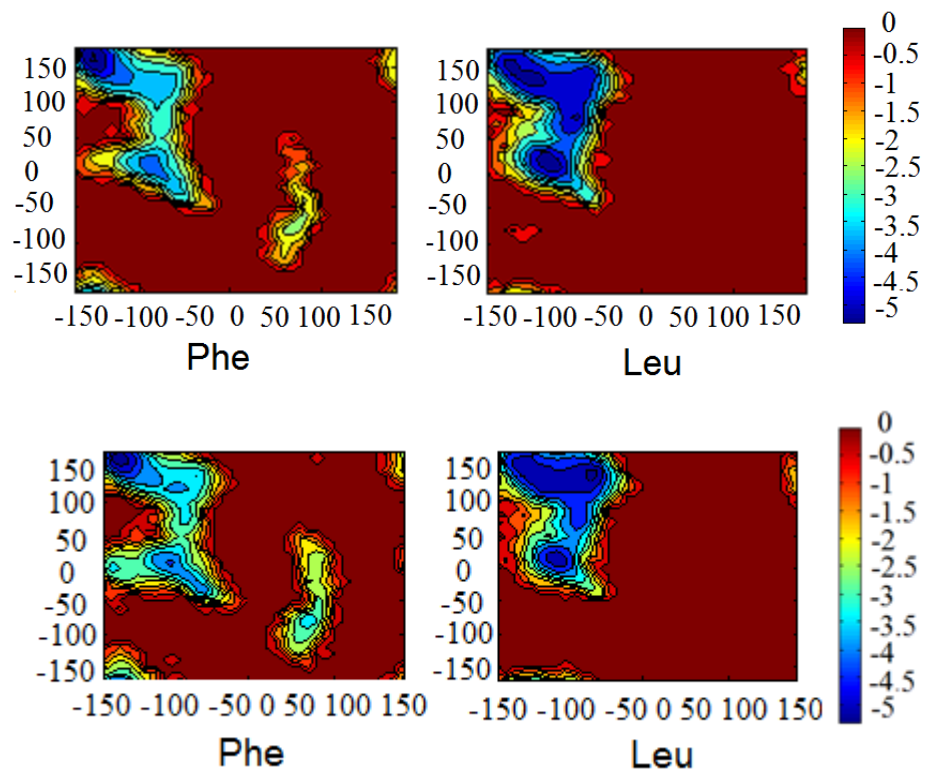

Figure S2. Ramachandran map for the backbone conformation of Ace-Phe-Leu-NMe in decane solution (upper panel) and the center region of POPC membrane (lower panel).

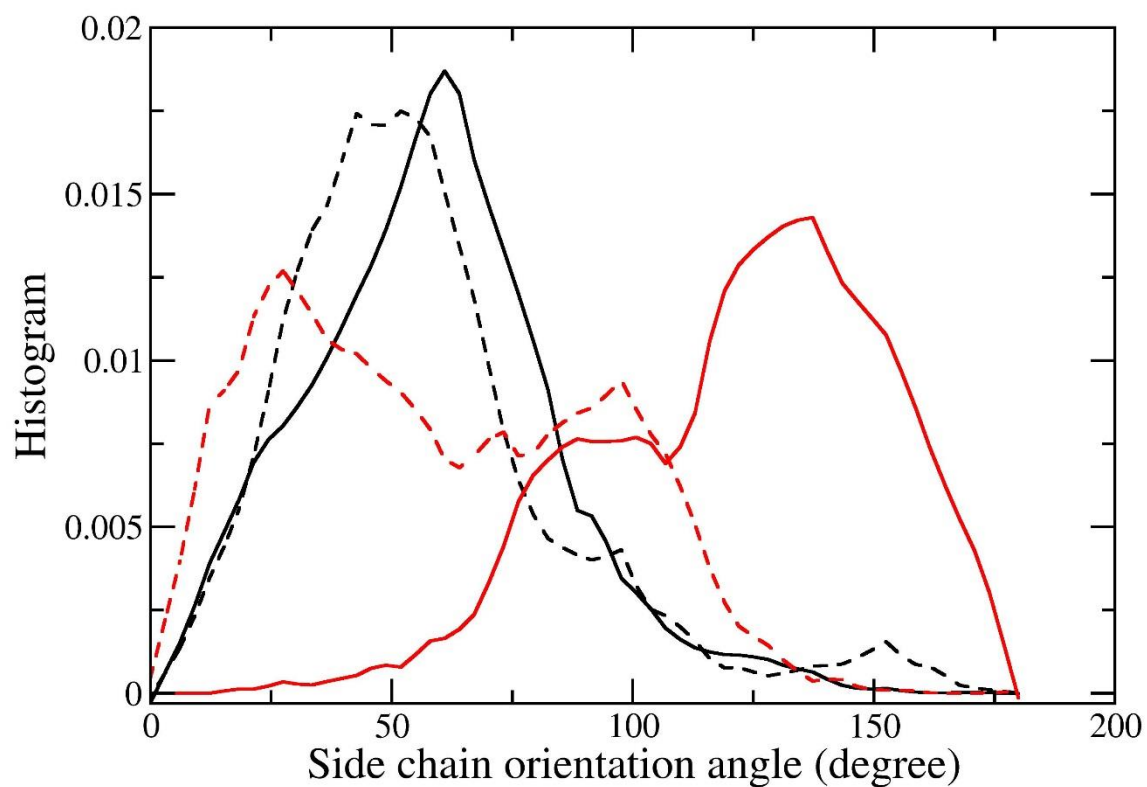

Figure S3. The distribution for the orientation of the side chains on Ace-Phe-Leu-Nme (black) and Ace-Ser-Leu-Nme (red) dipeptide. The solid and dashed black curve is for Phe and Leu residue on Ace-Phe-Leu-Nme, respectively; and the solid and dashed red curve is for Ser residue at N-terminal and C-terminal on Ace-Ser-Ser-Nme, respectively.

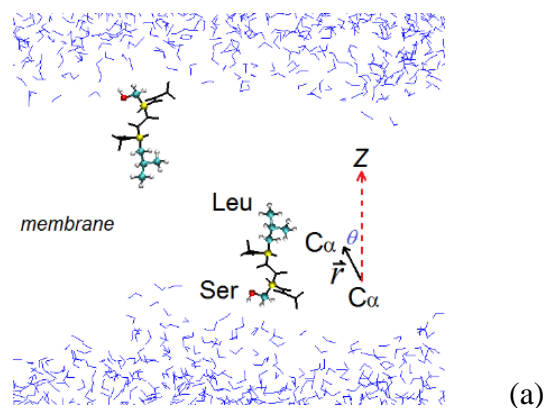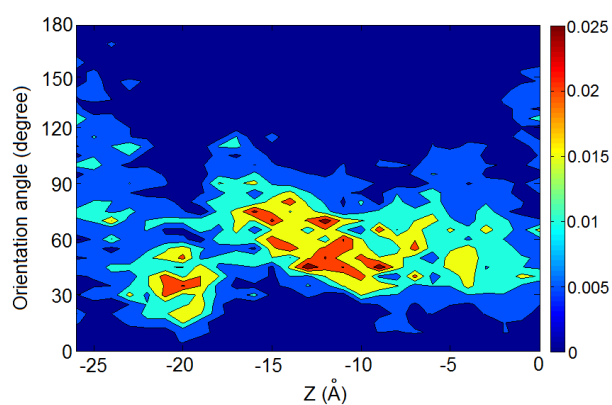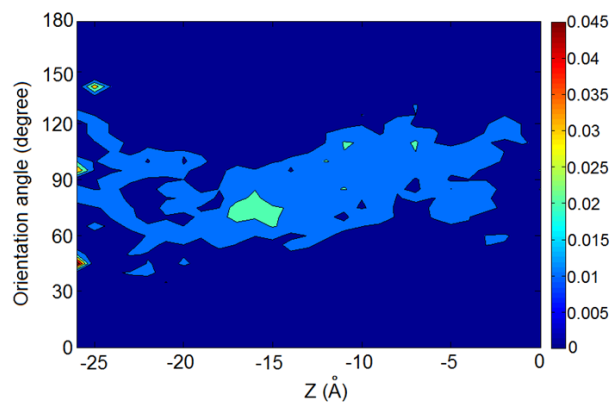

Figure S4. (a) The illustration of the orientation angle  $\theta$  between the vector  $\vec{r}_{mol}^{Ser-Leu}$  and  $\mathbf{Z}$  axis. Schematic plot of Ace-Ser-Leu-Nme inside POPC membrane, with Ser side chain in closer proximity to the interface than Leu side chain is also shown (side chains are represented in ball-and-stick model and  $C_{\alpha}$  atom is marked in yellow). (b) 2D distribution of Ace-Ser-Leu-NMe dipeptide orientation as a function of the distance  $z$  from the membrane center and the orientation angle  $\theta$ , (c) 2D distribution of Ace-Phe-Leu-NMe dipeptide orientation as a function of the distance  $z$  from the membrane center and the orientation angle  $\theta$ .

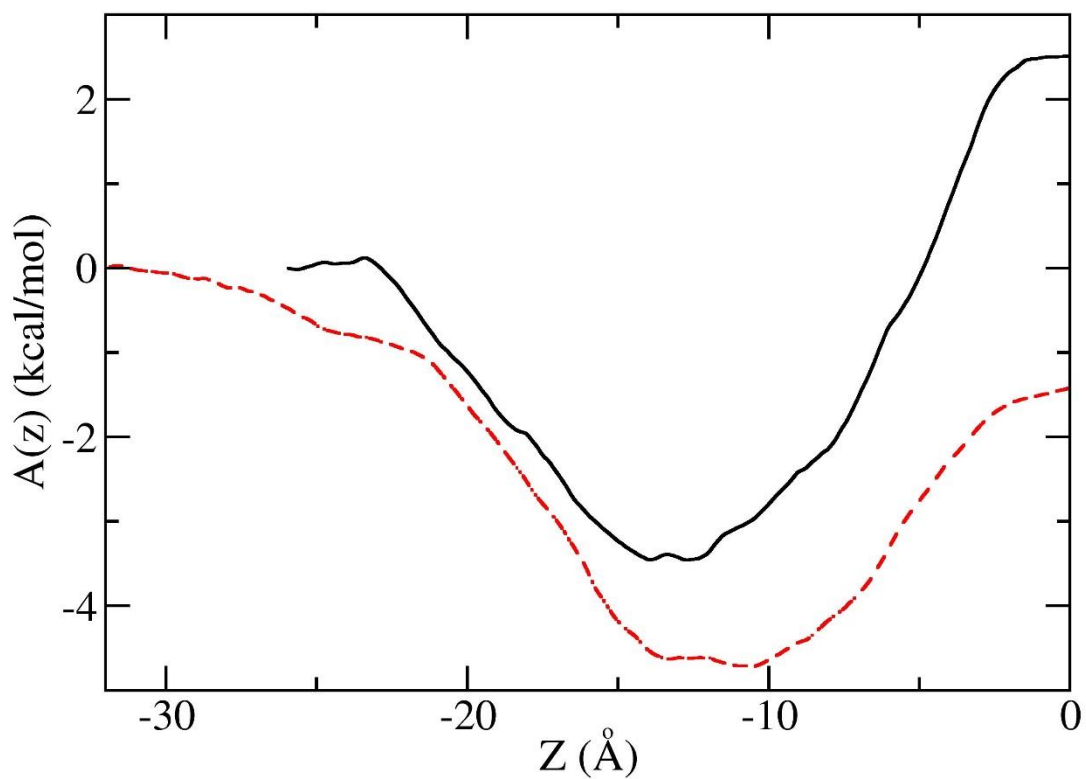

Figure S5. Free energy profile for Ace-Phe-NMe (solid black curve) and 3-methyl indole (red dashed curve) molecule as a function of the distance from the POPC membrane center ( $z = 0$ )



*Bayesian estimate of populations of different states of Ace-Ser-Ser-NMe dipeptide near the middle of the membrane.*

As argued in the main text, the probabilities,  $p(s_0, z)$ ,  $p(s_+, z)$ , and  $p(s_-, z)$  of observing the dipeptide in states  $s_0$ ,  $s_+$ , and  $s_-$  at  $z$  near the center of the bilayer are:

$$p(s_0, z) = \frac{\exp(-\beta\Delta A_0)}{2 \cosh(\beta fz) + \exp(-\beta\Delta A_0)} \quad (\text{S1})$$

$$p(s_+, z) = \frac{\exp(\beta fz)}{2 \cosh(\beta fz) + \exp(-\beta\Delta A_0)} \quad (\text{S2})$$

$$p(s_-, z) = \frac{\exp(-\beta fz)}{2 \cosh(\beta fz) + \exp(-\beta\Delta A_0)}, \quad (\text{S3})$$

where  $f$  is the absolute value of the average force acting on the dipeptide in states  $s_+$  and  $s_-$  in this range of  $z$ , and  $\beta=1/k_B T$ . Here  $\Delta A_0$  is a parameter that can be interpreted as the free energy difference between  $s_0$  and  $s_+$  or  $s_-$  state at  $z = 0$ . The free energies of  $s_+$  and  $s_-$  are equal at this plane by symmetry.

We wish to find the probability distribution of different values of  $\Delta A_0$ ,  $P(\Delta A_0 | S)$ , given the observed populations,  $s$ , of states  $s_0$ ,  $s_+$ , and  $s_-$  at  $n$  different value of  $z$ . To do so, we follow a standard Bayesian approach<sup>2</sup>. The posterior probability,  $P(\Delta A_0 | M, S)$ , where  $M$  is the probability model defined in Eq. (S1), Eq. (S2) and Eq. (S3), is expressed as:

$$P(\Delta A_0 | M, S) = \frac{P(S | \Delta A_0, M)P(\Delta A_0 | M)}{P(S | M)}. \quad (\text{S4})$$

If the prior,  $P(\Delta A_0 | M)$  is uniform, the posterior becomes proportional to the likelihood function.

$$P(\Delta A_0 | M, S) \propto P(S | \Delta A_0, M). \quad (\text{S5})$$

Our goal is to estimate the probability,  $P(S | \Delta A_0, M)$ , of generating data with the observed populations of the three states of interest at the given  $n$  values of  $z$

$$P(S | \Delta A_0, M) = \prod_{i=1}^n P(S_i^0 | \Delta A_0, M) P(S_i^+ | \Delta A_0, M) P(S_i^- | \Delta A_0, M), \quad (\text{S6})$$

where  $P(S_i^0 | \Delta A_0, M)$ ,  $P(S_i^+ | \Delta A_0, M)$  and  $P(S_i^- | \Delta A_0, M)$  are the probabilities of generating observed populations of states  $s_0$ ,  $s_+$  and  $s_-$ , respectively, at position  $z_i$  given a specific value of  $\Delta A_0$ . We wish to maximize this function with respect to  $\Delta A_0$ . Taking advantage of the monotonicity of logarithm, we maximize  $g(S, \Delta A_0) = \ln P(S | \Delta A_0, M)$  instead.

$$g(S | \Delta A_0) = \sum_{i=1}^n \left[ \ln P(S_i^0 | \Delta A_0, M) + \ln P(S_i^+ | \Delta A_0, M) + \ln P(S_i^- | \Delta A_0, M) \right]. \quad (\text{S7})$$

Taking advantage of Eq. (S1), Eq. (S2) and Eq. (S3),  $g(S, \Delta A_0)$  takes the form:

$$\begin{aligned} g(s, \Delta A_0) = & \sum_{i=1}^n \ln \left[ \frac{\exp(fz / k_B T)}{2 \cosh(fz / k_B T) + \exp(-\Delta A_0 / k_B T)} \right]^{\alpha_i^+} \\ & + \sum_{i=1}^n \ln \left[ \frac{\exp(-fz / k_B T)}{2 \cosh(fz / k_B T) + \exp(-\Delta A_0 / k_B T)} \right]^{\alpha_i^-} \\ & + \sum_{i=1}^n \ln \left[ \frac{\exp(-\Delta A_0 / k_B T)}{2 \cosh(fz / k_B T) + \exp(-\Delta A_0 / k_B T)} \right]^{\alpha_i^0}, \end{aligned} \quad (\text{S8})$$

where  $\alpha_i^0$ ,  $\alpha_i^+$  and  $\alpha_i^-$  are proportional to the populations of states  $s_0$ ,  $s_+$  and  $s_-$  at  $z_i$ . Therefore,  $\alpha_i^0 + \alpha_i^+ + \alpha_i^- = C$ , where  $C$  is a constant independent of  $z_i$ . Then

$$g(s, \Delta A_0) = - \left[ \sum_{i=1}^n \alpha_i^0 \right] \beta \Delta A_0 - \sum_{i=1}^n \ln [2 \cosh(\beta f z_i) + \exp(-\beta \Delta A_0)] + \sum_{i=1}^n (\alpha_i^+ - \alpha_i^-) \beta f z_i. \quad (\text{S9})$$

In this equation,  $C$  was taken as 1, since its specific value has no influence on the shape of  $g$  as a function of  $\Delta A_0$ . The last term in Eq. (S9) is independent of  $\Delta A_0$  and, therefore, will contribute only to the normalization constant. This reflects the fact that  $\Delta A_0$  in Eq. (S1), Eq. (S2) and Eq. (S3) changes only the proportion of  $S_0$  to  $S_+ + S_-$ , but not the proportion between  $S_+$  and  $S_-$ . The latter is defined by the value of  $f$  and the symmetry requirement with respect to the plane at  $z = 0$ . Thus, the function that we need to consider is

$$h(S, \Delta A_0) = - \left[ \sum_{i=1}^n \alpha_i^0 \right] \beta \Delta A_0 - \sum_{i=1}^n \ln [2 \cosh(\beta f z_i) + \exp(-\beta \Delta A_0)]. \quad (\text{S10})$$

Then, the posterior probability can be expressed as,

$$P(\Delta A_0 | M, S) = \exp[h(S, \Delta A_0)] / N. \quad (\text{S11})$$

where  $N$  is the normalization constant obtained from integrating  $\exp[h(S, \Delta A_0)]$  over  $\Delta A_0$ . In this particular instance, the observed populations of  $S_0$  were 0.31, 0.10, 0.38, 0.11, 0.09, 0.12 0.10 and 0.51 for simulations at  $z$  equal to 0.1, 0.2, 0.3, 0.4, 0.5, 0.6, 0.7 and 0.8 Å, respectively. The length of molecular dynamics trajectory for each value of  $z$  was approximately 400 ns. This yielded  $P(\Delta A_0 | M, S)$  shown in Figure S6. As we can see that this distribution is fairly broad and Gaussian-like, although the positive-  $\Delta A_0$  tail decays slower than the negative- $\Delta A_0$  tail. The maximum likelihood  $\Delta A_0$  is 0.05 kcal/mol, and the average  $\Delta A_0$  is 0.18 kcal/mol with the standard deviation of 0.56 kcal/mol.

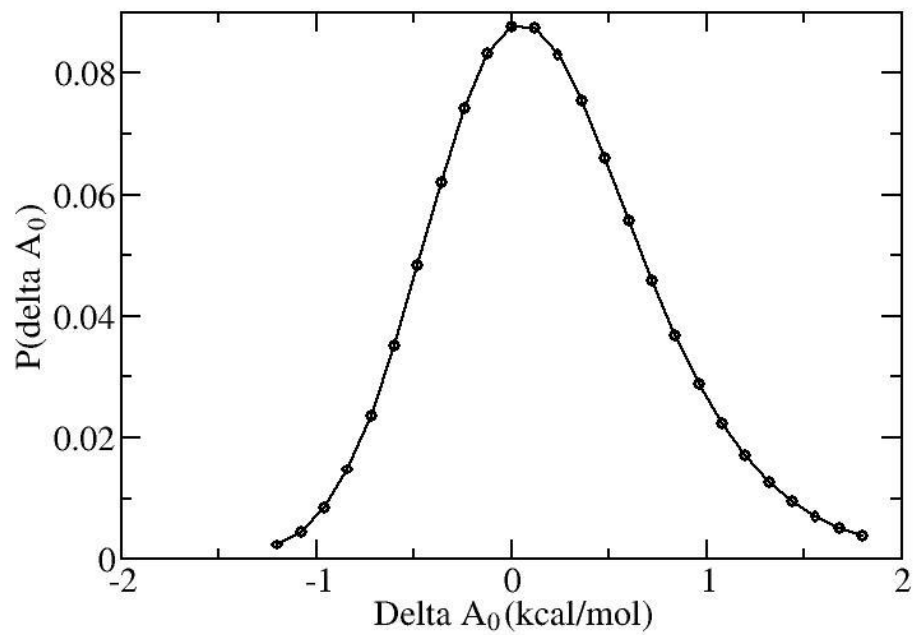

Figure S6. Normalized posterior probability distribution  $P(\Delta A_0 | M, S)$ , as a function of  $\Delta A_0$ .

### References.

- (1.) Kubo, R. The Fluctuation-Dissipation Theorem. *Rep. Prog. Phys.* **1966**, 29, 255–284.
- (2.) Sivia, D. S. *Data Analysis. A Bayesian Tutorial*. Clarendon Press, Oxford, 1996.
